# Supplementary material
Source: PubMed Central journal article supplement (PMC3194100)
Supplement: NIHMS327520-supplement-Supp_Fig_S1-S2___Table_S1.pdf [file NIHMS327520-supplement-Supp_Fig_S1-S2___Table_S1.pdf]

1 **Supporting information**

2

3 **Supplemental Figure 1**

4

5 **Number of hook-basal-body (HBB) complexes as analyzed by C-ring-GFP microscopy and**  
6 **hook immunostaining.**

7 **(A) Number of C-ring complexes as analyzed by FliG-GFP microscopy.** A strain harboring a  
8 functional FliG-GFP fusion as well as the *flhDC* operon under arabinose control was grown in the  
9 presence or absence of arabinose and analyzed by fluorescence microscopy. Upper panel:  
10 distribution of C-rings per cell and exemplary images of cells expressing FliG-GFP in the absence  
11 of arabinose (wildtype *flhDC* levels). Non-linear fitting of the Gaussian distribution was  
12 employed (red line) and the average number of C-rings per cell is  $5.2 \pm 1.3$  (n = 117). Lower  
13 panel: distribution of C-rings per cell and exemplary images of cells expressing FliG-GFP in the  
14 presence of arabinose (increased *flhDC* levels). Non-linear fitting of the Gaussian distribution was  
15 employed (red line) and the average number of C-rings per cell is  $7.8 \pm 2.2$  (n = 115). Scale bar is  
16 2  $\mu$ M.

17 **(B) Number of C-ring complexes as analyzed by FliM-GFP microscopy.** A strain harboring a  
18 functional FliM-GFP fusion as well as several *flhD* promoter mutations was analyzed by  
19 fluorescence microscopy. Upper panel: distribution of C-rings per cell and exemplary images of a  
20 strain expressing FliM-GFP with a wildtype *flhD* promoter. Non-linear fitting of the Gaussian  
21 distribution was employed (red line) and the average number of C-rings per cell is  $5.6 \pm 2.2$  (n =  
22 266). Middle panel: distribution of C-rings per cell and exemplary images of a strain expressing

1 FlIM-GFP with a perfect -10 box of the P1 *flhD* promoter. Non-linear fitting of the Gaussian  
2 distribution was employed (red line) and the average number of C-rings per cell is  $8.0 \pm 2.0$  (n =  
3 138). Lower panel: distribution of C-rings per cell and exemplary images of a strain expressing  
4 FlIM-GFP with a perfect -10 box of the P1 + P4 *flhD* promoter. Non-linear fitting of the Gaussian  
5 distribution was employed (red line) and the average number of C-rings per cell is  $8.9 \pm 2.2$  (n =  
6 197). Scale bar is 2  $\mu$ M.

7 **(C) Number of assembled hook-basal-body (HBB) complexes as analyzed by hook**  
8 **immunostaining.** A strain harboring a functional FlgE::3xHA mutation as well as *flhDC* under  
9 arabinose control was grown in the presence or absence of arabinose and analyzed by  
10 fluorescence microscopy. Upper panel: exemplary images of cells with immunostained hooks in  
11 the absence of arabinose (wildtype *flhDC* levels). Lower panel: exemplary images of cells with  
12 immunostained hooks in the presence of arabinose (increased *flhDC* levels). Green: HBB  
13 complexes (FlgE::3xHA tag) labeled with anti-hemagglutinin antibodies coupled to Alexa Fluor  
14 488. Red: cell membrane stained with FM-64. Blue: DNA stained with Hoechst. Scale bar is 2  
15  $\mu$ M.

16

## 17 **Supplemental Figure 2**

18 **Schematic of the *flhD* promoter region.** The DNA sequence of the *flhD* promoter region of *S.*  
19 *enterica* and the six described transcriptional start sites (Yanagihara *et al.*, 1999) of the *flhD*  
20 promoter are displayed. A red box annotates the wildtype -10 box sequence, whereas the black  
21 box annotates the respective consensus -10 box mutation. A black arrow displays the  
22 transcriptional start site (+1) of the respective promoter.

23

## 1 Supporting Table 1

### 2 *Salmonella enterica* serovar *typhimurium* strains used and constructed in this study.

| Strains | Relevant characteristics                                                                         | Source or reference <sup>a</sup> |
|---------|--------------------------------------------------------------------------------------------------|----------------------------------|
| TH437   | LT2 Wild-type for motility and chemotaxis                                                        | J. Roth                          |
| TH7420  | <i>fliM5978::GFPmut2</i>                                                                         | lab stock                        |
| TH9857  | <i>ecnR::T-POP ecnR3::MudJ</i>                                                                   | C. E. Wozniak                    |
| TH9949  | <i>flgE6554::bla ΔflgBC6557</i>                                                                  | (Lee & Hughes, 2006)             |
| TH10068 | <i>ecnR3::MudJ</i>                                                                               | (Wozniak <i>et al.</i> , 2008)   |
| TH12470 | <i>flgE6569::bla ΔflgBC6557 ΔfliMN7392</i>                                                       |                                  |
| TH12731 | <i>ΔflgBC6557 flgE6569::bla ΔfliP7457</i>                                                        |                                  |
| TH14156 | <i>ΔaraBAD1007::flhD<sup>+</sup>C<sup>+</sup></i>                                                |                                  |
| TH14525 | <i>flgE7742::3xHA</i> (HA-tag after AA241)                                                       | F. F. V. Chevance                |
| TH14680 | <i>ΔflgBC6557 flgE6569::bla PflhDC7460</i> (-38G:A from AUG) <i>STM1911::Tn10dTc ΔfliG7388</i>   |                                  |
| TH14681 | <i>ΔflgBC6557 flgE6569::bla PflhDC7461</i> (-152C:T from AUG) <i>STM1911::Tn10dTc ΔfliMN7392</i> |                                  |
| TH14683 | <i>ΔflgBC6557 flgE6569::bla zec-3521::Tn10dCm ΔfliMN7392 fliA7463</i> (Ap <sup>5R</sup> )        |                                  |
| TH14684 | <i>ΔflgBC6557 flgE6569::bla zec-3521::Tn10dCm ΔfliMN7392 fliA7464</i>                            |                                  |
| TH14781 | <i>PflhDC7776</i> (P1 -10 TATAAT promoter)                                                       | C. E. Wozniak                    |

C-ring requirement in flagellar type III secretion is bypassed by FlhDC upregulation

|         |                                                                                                                                                         |               |
|---------|---------------------------------------------------------------------------------------------------------------------------------------------------------|---------------|
|         | <i>fliM5978::GFPmut2</i>                                                                                                                                |               |
| TH14782 | <i>PflhDC7777</i> (P5 -10 TATAAT promoter)<br><i>fliM5978::GFPmut2</i>                                                                                  | C. E. Wozniak |
| TH14815 | <i>PflhDC7790</i> (P3 -10 TATAAT) <i>fliM5978::GFPmut2</i>                                                                                              | C. E. Wozniak |
| TH14902 | $\Delta$ <i>araBAD1007::flhD<sup>+</sup>C<sup>+</sup></i> $\Delta$ <i>flgBC6557 flgE6569::bla</i>                                                       |               |
| TH14903 | $\Delta$ <i>araBAD1007::flhD<sup>+</sup>C<sup>+</sup></i> $\Delta$ <i>flgBC6557 flgE6569::bla</i><br>$\Delta$ <i>fliF7387</i>                           |               |
| TH14905 | $\Delta$ <i>araBAD1007::flhD<sup>+</sup>C<sup>+</sup></i> $\Delta$ <i>flgBC6557 flgE6569::bla</i><br>$\Delta$ <i>fliHIJ7398</i>                         |               |
| TH14906 | $\Delta$ <i>araBAD1007::flhD<sup>+</sup>C<sup>+</sup></i> $\Delta$ <i>flgBC6557 flgE6569::bla</i><br>$\Delta$ <i>fliG7402</i> $\Delta$ <i>fliMN7392</i> |               |
| TH14909 | $\Delta$ <i>araBAD1007::flhD<sup>+</sup>C<sup>+</sup></i> $\Delta$ <i>flgBC6557 flgE6569::bla</i><br>$\Delta$ <i>fliMN7392 fliG7780::GFPmut2</i>        |               |
| TH14924 | <i>PflhDC7793</i> (P1 + P4 -10 TATAAT)<br><i>fliM5978::GFPmut2</i>                                                                                      |               |
| TH14980 | <i>PflhDC7797</i> (P2 -10 TATAAT) <i>fliM5978::GFPmut2</i>                                                                                              | C. E. Wozniak |
| TH14981 | <i>PflhDC7798</i> (P6 -10 TATAAT) <i>fliM5978::GFPmut2</i>                                                                                              | C. E. Wozniak |
| TH15184 | <i>flgE7742::3xHA</i> $\Delta$ <i>araBAD1007::flhD<sup>+</sup>C<sup>+</sup></i>                                                                         |               |
| TH15413 | <i>PflhD7776</i> (P1 -10 TATAAT) <i>flhC5213::MudJ</i><br><i>fliM5978::GFPmut2</i>                                                                      |               |
| TH15414 | <i>PflhD7793</i> (P1 + P4 -10 TATAAT) <i>flhC5213::MudJ</i><br><i>fliM5978::GFPmut2</i>                                                                 |               |
| TH15415 | <i>PflhD7797</i> (P2 -10 TATAAT) <i>flhC5213::MudJ</i>                                                                                                  |               |

C-ring requirement in flagellar type III secretion is bypassed by FlhDC upregulation

|         |                                                                                                                                       |  |
|---------|---------------------------------------------------------------------------------------------------------------------------------------|--|
|         | <i>fliM5978::GFPmut2</i>                                                                                                              |  |
| TH15434 | <i>PflhDC7793</i> (P1 + P4 -10 TATAAT) $\Delta$ <i>flgBC6557</i><br><i>flgE6569::bla</i> $\Delta$ <i>fliP7457</i>                     |  |
| TH15461 | <i>fliL5100::MudJ fliD7879::TPOP</i>                                                                                                  |  |
| TH15462 | <i>fliL5100::MudJ lrhA2::TPOP</i>                                                                                                     |  |
| TH15463 | <i>fliL5100::MudJ STM1856-1::TPOP</i>                                                                                                 |  |
| TH15464 | <i>fliL5100::MudJ slyA1::TPOP</i>                                                                                                     |  |
| TH15466 | <i>fliL5100::MudJ ddg/yfdZ1::TPOP</i>                                                                                                 |  |
| TH15467 | <i>fliL5100::MudJ STM2011-2::TPOP</i>                                                                                                 |  |
| TH15468 | <i>fliL5100::MudJ fliD7881::TPOP</i>                                                                                                  |  |
| TH15469 | <i>fliL5100::MudJ ecnR6::TPOP</i>                                                                                                     |  |
| TH15470 | <i>fliL5100::MudJ STM1856-2::TPOP</i>                                                                                                 |  |
| TH15471 | <i>fliL5100::MudJ ecnR7::TPOP</i>                                                                                                     |  |
| TH15496 | <i>ecnR3::MudJ ecnR7::TPOP</i>                                                                                                        |  |
| TH15497 | $\Delta$ <i>araBAD1007::flhD<sup>+</sup>C<sup>+</sup></i> <i>flgE6569::bla</i> $\Delta$ <i>flgBC6557</i><br>$\Delta$ <i>fliG7388</i>  |  |
| TH15498 | $\Delta$ <i>araBAD1007::flhD<sup>+</sup>C<sup>+</sup></i> <i>flgE6569::bla</i> $\Delta$ <i>flgBC6557</i><br>$\Delta$ <i>fliMN7392</i> |  |
| TH15567 | <i>flgE7742::3xHA PflhDC7776</i>                                                                                                      |  |
| TH15568 | <i>flgE7742::3xHA PflhDC7793</i>                                                                                                      |  |
| TH15569 | <i>flgE7742::3xHA PflhDC7797</i>                                                                                                      |  |
| TH15589 | <i>flgE6569::bla</i> $\Delta$ <i>flgBC6557</i> $\Delta$ <i>fliMN7392 lrhA1</i>                                                        |  |
| TH15590 | <i>flgE6569::bla</i> $\Delta$ <i>flgBC6557</i> $\Delta$ <i>fliMN7393 lrhA2</i>                                                        |  |

C-ring requirement in flagellar type III secretion is bypassed by FlhDC upregulation

|         |                                                      |  |
|---------|------------------------------------------------------|--|
| TH15591 | <i>flgE6569::bla ΔflgBC6557 ΔfliMN7394 lrhA3</i>     |  |
| TH15592 | <i>flgE6569::bla ΔflgBC6557 ΔfliMN7395 lrhA4</i>     |  |
| TH15593 | <i>flgE6569::bla ΔflgBC6557 ΔfliMN7396 lrhA5</i>     |  |
| TH15594 | <i>flgE6569::bla ΔflgBC6557 ΔfliMN7397 ecnR6</i>     |  |
| TH15595 | <i>flgE6569::bla ΔflgBC6557 ΔfliMN7398 ecnR7</i>     |  |
| TH15596 | <i>flgE6569::bla ΔflgBC6557 ΔfliMN7399 slyA1</i>     |  |
| TH15597 | <i>flgE6569::bla ΔflgBC6557 ΔfliMN7400 rcsB131</i>   |  |
| TH15598 | <i>flgE6569::bla ΔflgBC6557 ΔfliMN7401 rcsB132</i>   |  |
| TH15599 | <i>flgE6569::bla ΔflgBC6557 ΔfliMN7402 yojN253</i>   |  |
| TH15600 | <i>flgE6569::bla ΔflgBC6557 ΔfliMN7406 clpP71</i>    |  |
| TH15601 | <i>flgE6569::bla ΔflgBC6557 ΔfliMN7403 ydiV254</i>   |  |
| TH15602 | <i>flgE6569::bla ΔflgBC6557 ΔfliMN7404 ydiV255</i>   |  |
| TH15603 | <i>flgE6569::bla ΔflgBC6557 ΔfliMN7405 ydiV256</i>   |  |
| TH15604 | <i>flgE6569::bla ΔflgBC6557 ΔfliMN7423 STM1856-1</i> |  |
| TH15605 | <i>flgE6569::bla ΔflgBC6557 ΔfliMN7424 STM1856-2</i> |  |
| TH15606 | <i>flgE6569::bla ΔflgBC6557 ΔfliMN7425 STM2011-1</i> |  |
| TH15607 | <i>flgE6569::bla ΔflgBC6557 ΔfliMN7426 STM2011-2</i> |  |
| TH15608 | <i>flgE6569::bla ΔflgBC6557 ΔfliMN7427 rfbP1</i>     |  |
| TH15609 | <i>flgE6569::bla ΔflgBC6557 ΔfliMN7428 pgtE1</i>     |  |
| TH15610 | <i>flgE6569::bla ΔflgBC6557 ΔfliMN7429 ddg/yfdZ1</i> |  |
| TH15611 | <i>flgE6569::bla ΔflgBC6557 ΔfliMN7430 pykF1</i>     |  |
| TH15612 | <i>flgE6569::bla ΔflgBC6557 ΔfliMN7431 garL1</i>     |  |
| TH15613 | <i>flgE6569::bla ΔflgBC6557 ΔfliMN7432 yieP1</i>     |  |

|         |                                                                                                                               |  |
|---------|-------------------------------------------------------------------------------------------------------------------------------|--|
| TH15614 | <i>flgE6569::bla ΔflgBC6557 ΔfliMN7433 hpaX1</i>                                                                              |  |
| TH15615 | <i>flgE6569::bla ΔflgBC6557 ΔfliMN7410 flhDC7872</i>                                                                          |  |
| TH15616 | <i>flgE6569::bla ΔflgBC6557 ΔfliMN7411 flhDC7873</i>                                                                          |  |
| TH15617 | <i>flgE6569::bla ΔflgBC6557 ΔfliMN7412 flhDC7874</i>                                                                          |  |
| TH15618 | <i>flgE6569::bla ΔflgBC6557 ΔfliMN7413 flhDC7875</i>                                                                          |  |
| TH15619 | <i>flgE6569::bla ΔflgBC6557 ΔfliMN7407 fliA7876</i>                                                                           |  |
| TH15620 | <i>flgE6569::bla ΔflgBC6557 ΔfliMN7408 fliA7877</i>                                                                           |  |
| TH15621 | <i>flgE6569::bla ΔflgBC6557 ΔfliMN7409 fliA7878</i>                                                                           |  |
| TH15622 | <i>flgE6569::bla ΔflgBC6557 ΔfliMN7418 fliD7879</i>                                                                           |  |
| TH15623 | <i>flgE6569::bla ΔflgBC6557 ΔfliMN7419 fliD7880</i>                                                                           |  |
| TH15624 | <i>flgE6569::bla ΔflgBC6557 ΔfliMN7420 fliD7881</i>                                                                           |  |
| TH15625 | <i>flgE6569::bla ΔflgBC6557 ΔfliMN7421 fliD7882</i>                                                                           |  |
| TH15756 | <i>flgE6569::bla ΔflgBC6557 ΔfliMN7421 ΔfliT5758::FCF</i>                                                                     |  |
| TH15885 | <i>flhC5213::MudJ ΔaraBAD1049::slyA<sup>+</sup> (D97E and A98P compared to the published <i>S.t.</i> LT2 genome sequence)</i> |  |
| TH15886 | <i>flhC5213::MudJ ΔaraBAD1049::lrhA<sup>+</sup></i>                                                                           |  |
| TH15939 | <i>ΔaraBAD956::fliA<sup>+</sup> ΔflgM5628::FRT ΔfliA5647::FRT flhC5213::MudJ</i>                                              |  |

1

2 <sup>a</sup> Strains for which no source or reference is given were constructed for this study.

3

4

1 **References**

2

3 Lee, H. J. & K. T. Hughes, (2006) Posttranscriptional control of the *Salmonella enterica* flagellar

4 hook protein FlgE. *J Bacteriol* **188**: 3308-3316.

5 Wozniak, C. E., C. Lee & K. T. Hughes, (2008) T-POP array identifies EcnR and PefI-SrgD as

6 novel regulators of flagellar gene expression. *Journal of Bacteriology*.

7 Yanagihara, S., S. Iyoda, K. Ohnishi, T. Iino & K. Kutsukake, (1999) Structure and transcriptional

8 control of the flagellar master operon of *Salmonella typhimurium*. *Genes Genet Syst* **74**:

9 105-111.

10

11



# Supplemental Figure 1

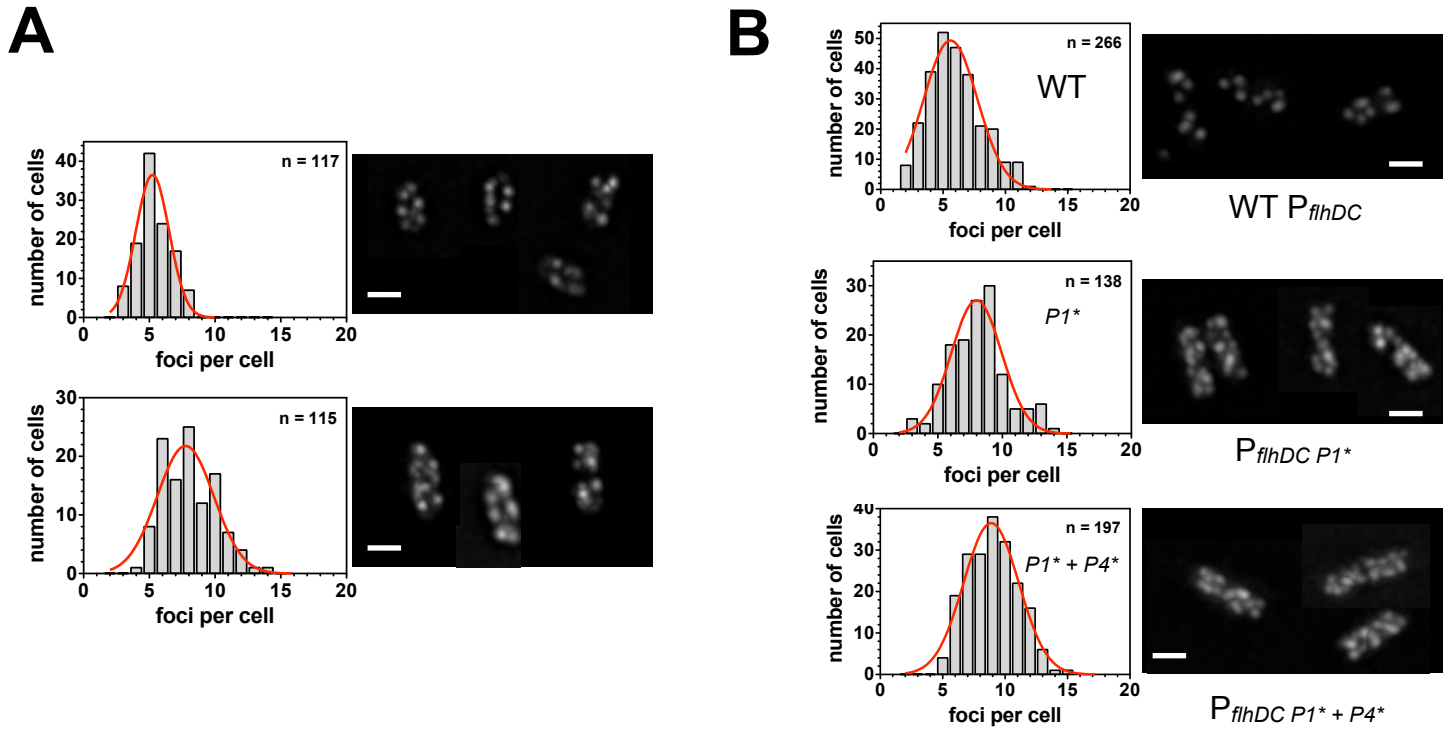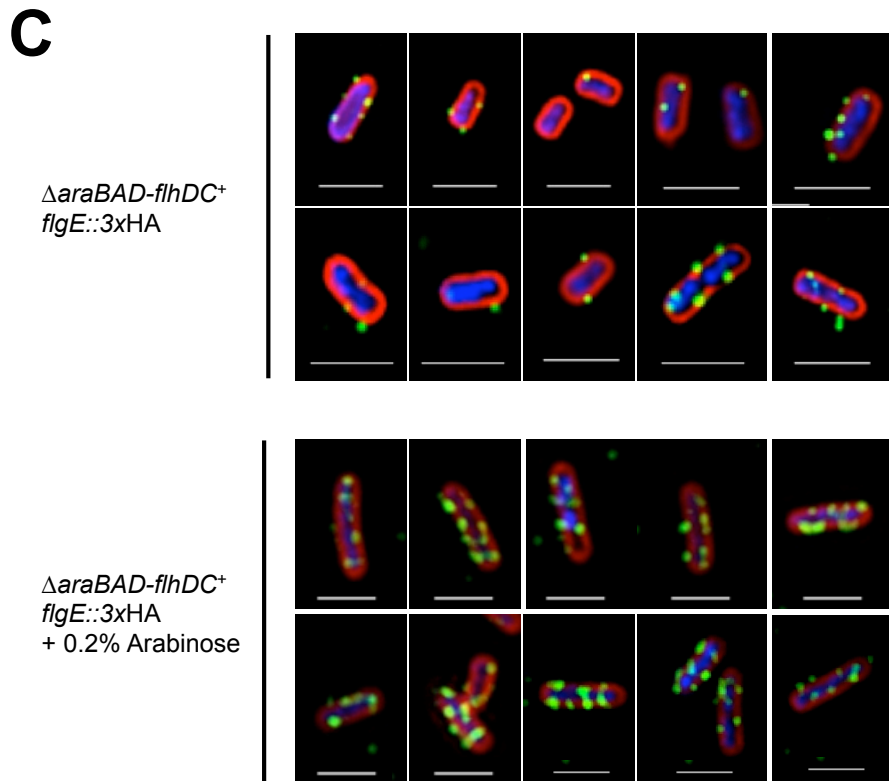

# Supplemental Figure 2

GAGGGCG **TATAAT** **P5**  
GAGGGCG **TATGCT** GTGACGAGATTAATTAATAACGTTTAATATTTAAGCTACTGTTTACT < 60  
10 20 30 40 50

AAAGGTAAAATAAAAGCGTTTCTAAAATAGAAATAATAGCCTGTTATCTATTATCCTGGC < 120  
70 80 90 100 110

GTTATTTTAAACAGAGAGAAACAAAAAGAATTTGGTGTTGACGTACCCCTATTCAGCAGT < 180  
130 140 150 160 170

**TATAAT** **P4**  
**GTGGAAT** TAGAAAAAGTGAACATTAGGTTATTAATTAACAAAGTAAAAGCCATGCTGATG < 240  
190 200 210 220 230

**TATAAT** **P3** **TATAAT** **P6** **TATAAT** **P2**  
GTTT **TATCGT** TAAGTATTCCGT **TAAAAT** ATGTGATCTGCATCACAT **TATTTT** CTAAAATCGC < 300  
250 260 270 280 290

**TATAAT** **P1**  
CGTCCCGCTCCGTTGTATGTCACGAAGCTGACGAG **TAGAGT** TGCGT CGAATTAGGAAAAA < 360  
310 320 330 340 350

TCTTAGGCATTTGTAAAATTGATGTAAACGTGTAAGGCGAATCTCAGTGGGAGGCTGCG < 420  
370 380 390 400 410

TTATACGTCACAATGTCCATAATGTCTGAGCGCTGCTATGCATTTGACCTTTTTGCTTCT < 480  
430 440 450 460 470

TTTACCGGGCCTTCCCGGCGACATCACGGGGTGC GGCTACGTGCGCACAAAAATAAAGTTG < 540  
490 500 510 520 530

GTTATTCTGG**ATG** < 553  
550
